# Supplementary material for: Combined platelet-rich plasma and lipofilling treatment provides great improvement in facial skin-induced lesion regeneration for scleroderma patients
Source: PubMed Central journal article supplement (PMC5651639; doi:10.1186/s13287-017-0690-3), 2017-10-23
Supplement: 13287_2017_690_MOESM2_ESM.pdf [file 13287_2017_690_MOESM2_ESM.pdf]

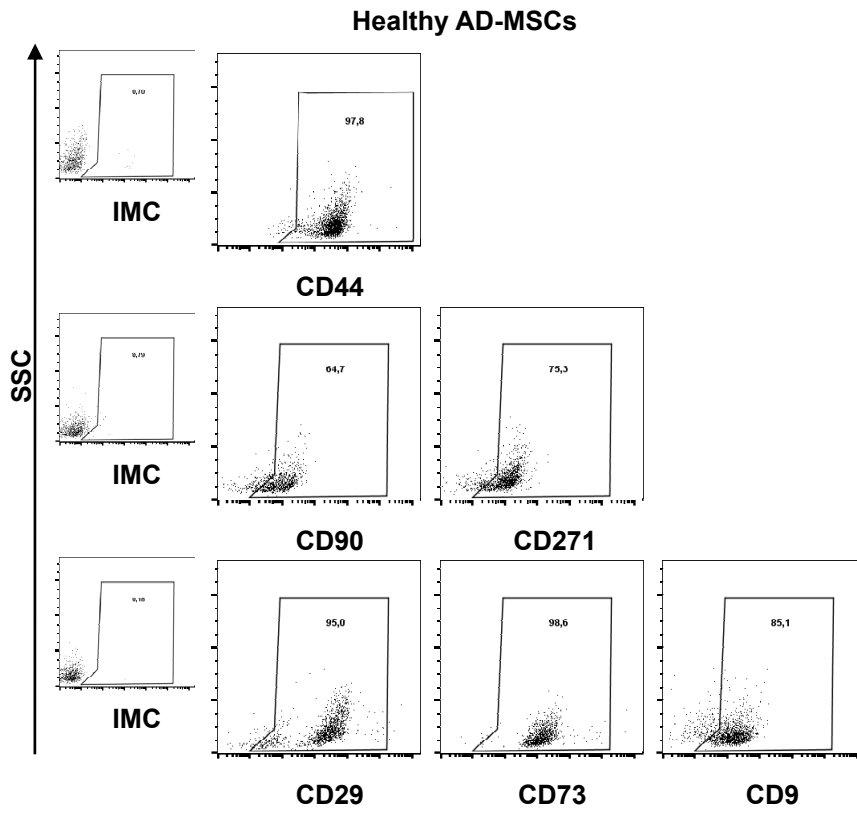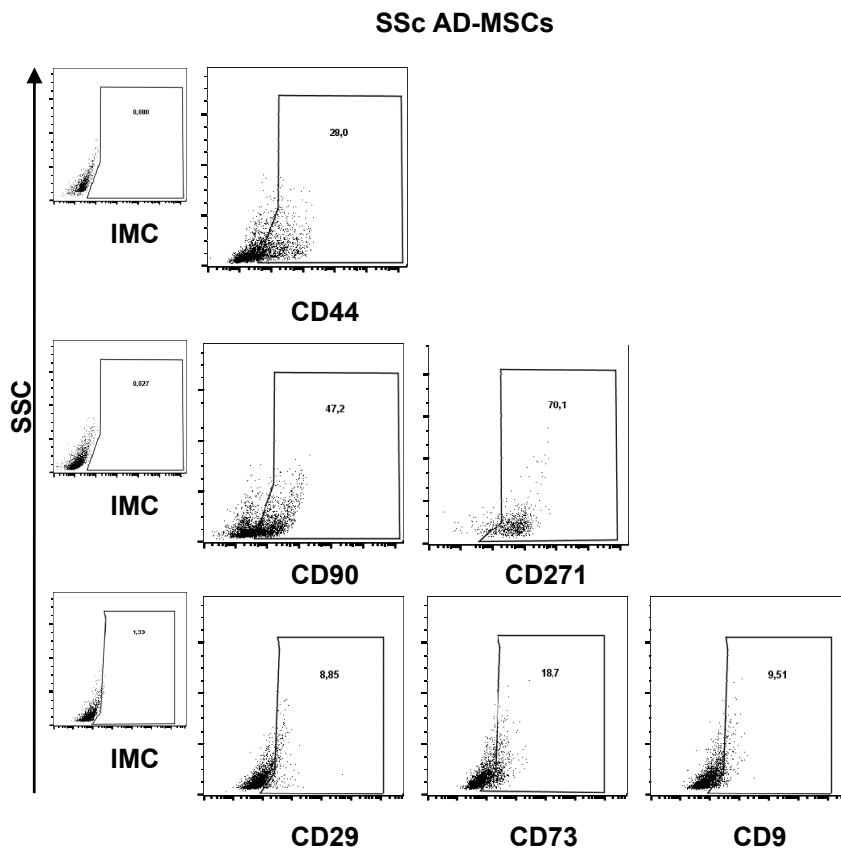

Figure S2
